# Supplementary material for: Update on the First Finding of the Rat Lungworm, Angiostrongylus cantonensis, in Rattus spp. in Continental Europe, Valencia, Spain, 2022
Source: Pathogens. 2023 Apr 6;12(4):567. doi: 10.3390/pathogens12040567 (PMC10143490; doi:10.3390/pathogens12040567)
Supplement: Supplementary file 1 [file pathogens-12-00567-s001.zip › Table S1.xls]

## Sheet: Hoja 1 - Table S1
Appendix B. Table B1
	RV83_female	RV78_female	RV85_female	RV76_female	RV78_male	RV76_male	RV85_male	RV83_male	GU138108 A. cantonenis Japan	GU138111 A. cantonensis Brazil	KF591126 A. cantonensis Taiwan (reversed)	GU138107 A. cantonensis Japan	KY779736 A. cantonensis Cambodia	MH069730 A. cantonensis USA	MH069734 A. cantonensis USA	ON819884_Valencia male	MH069731 A. cantonensis USA	MH069735 A. cantonensis USA	MH069733 A. cantonensis USA	MK516736 A. cantonensis Thailand	MK516735 A. cantonensis Thailand	AB684370 A. cantonensis Japan Okinawa	KY779737 A. cantonensis Laos	KY779738 A. cantonensis Vietnam	MK570631 A. cantonensis Australia Mosman	MK570629 A. cantonensis Spain Tenerife	MH069736 A. cantonensis USA	MH069732 A. cantonensis USA	GU138110 A. cantonensis Brazil	AB684368 A. cantonensis Thailand Bangkok	JX471057 A. cantonensis Brazil	JX471061 A. cantonensis Brazil	JX471060 A. cantonensis Brazil	JX471059 A. cantonensis Brazil	JX471058 A. cantonensis Brazil	JX471068 A. cantonensis Brazil	JX471056 A. cantonensis Brazil	KY703435 A. cantonensis Thailand	KY703433 A. cantonensis Thailand	KY703434 A. cantonensis Thailand	KY703436 A. cantonensis Thailand	JX471054 A. cantonensis Brazil	MN227185 A. cantonensis Spain Balearic Islands Majorca	JX471065 A. cantonensis Brazil	ON819883_Valencia female	JX471055 A. cantonensis Brazil	JX471067 A. cantonensis Brazil	JX471066 A. cantonensis Brazil	JX471064 A. cantonensis Brazil
RV83_female		0	0	0	0	0	4	4	12	0	137	16	19	12	4	4	16	12	12	53	23	16	53	44	4	4	12	12	0	24	0	0	16	16	0	0	0	28	15	53	32	16	4	0	4	67	0	0	0
RV78_female	0		0	0	0	0	4	4	12	0	137	16	19	12	4	4	16	12	12	53	23	16	53	44	4	4	12	12	0	24	0	0	16	16	0	0	0	28	15	53	32	16	4	0	4	67	0	0	0
RV85_female	0	0		0	0	0	4	4	12	0	137	16	19	12	4	4	16	12	12	53	23	16	53	44	4	4	12	12	0	24	0	0	16	16	0	0	0	28	15	53	32	16	4	0	4	67	0	0	0
RV76_female	0	0	0		0	0	4	4	12	0	137	16	19	12	4	4	16	12	12	53	23	16	53	44	4	4	12	12	0	24	0	0	16	16	0	0	0	28	15	53	32	16	4	0	4	67	0	0	0
RV78_male	0	0	0	0		0	4	4	12	0	137	16	19	12	4	4	16	12	12	53	23	16	53	44	4	4	12	12	0	24	0	0	16	16	0	0	0	28	15	53	32	16	4	0	4	67	0	0	0
RV76_male	0	0	0	0	0		4	4	12	0	137	16	19	12	4	4	16	12	12	53	23	16	53	44	4	4	12	12	0	24	0	0	16	16	0	0	0	28	15	53	32	16	4	0	4	67	0	0	0
RV85_male	4	4	4	4	4	4		0	8	4	131	12	16	8	0	0	12	8	8	49	19	12	49	40	0	0	8	8	4	20	4	4	12	12	4	4	4	23	12	49	28	12	0	4	0	72	4	4	4
RV83_male	4	4	4	4	4	4	0		8	4	131	12	16	8	0	0	12	8	8	49	19	12	49	40	0	0	8	8	4	20	4	4	12	12	4	4	4	23	12	49	28	12	0	4	0	72	4	4	4
GU138108 A. cantonenis Japan	12	12	12	12	12	12	8	8		11	128	0	16	8	8	8	11	8	8	40	23	0	40	39	8	8	8	8	11	19	11	11	0	0	11	11	11	23	4	40	27	0	8	11	8	70	11	11	11
GU138111 A. cantonensis Brazil	0	0	0	0	0	0	4	4	11		136	15	19	11	4	4	15	11	11	53	23	15	53	44	4	4	11	11	0	23	0	0	15	15	0	0	0	27	15	53	32	15	4	0	4	67	0	0	0
KF591126 A. cantonensis Taiwan (reversed)	137	137	137	137	137	137	131	131	128	136		134	124	139	130	130	143	139	139	129	119	134	129	133	130	130	139	139	136	115	136	136	134	134	136	136	136	103	133	141	104	134	130	136	130	108	136	136	136
GU138107 A. cantonensis Japan	16	16	16	16	16	16	12	12	0	15	134		20	11	11	11	15	11	11	44	27	0	44	43	11	11	11	11	15	23	15	15	0	0	15	15	15	27	8	44	32	0	11	15	11	75	15	15	15
KY779736 A. cantonensis Cambodia	19	19	19	19	19	19	16	16	16	19	124	20		15	15	15	20	15	15	48	23	20	48	39	15	15	15	15	19	19	19	19	20	20	19	19	19	23	12	48	27	20	15	19	15	70	19	19	19
MH069730 A. cantonensis USA	12	12	12	12	12	12	8	8	8	11	139	11	15		8	8	4	0	0	57	27	11	57	47	8	8	0	0	11	27	11	11	11	11	11	11	11	31	4	57	36	11	8	11	8	79	11	11	11
MH069734 A. cantonensis USA	4	4	4	4	4	4	0	0	8	4	130	11	15	8		0	12	8	8	48	19	11	48	39	0	0	8	8	4	19	4	4	11	11	4	4	4	23	11	48	28	11	0	4	0	71	4	4	4
ON819884_Valencia male	4	4	4	4	4	4	0	0	8	4	130	11	15	8	0		12	8	8	48	19	11	48	39	0	0	8	8	4	19	4	4	11	11	4	4	4	23	11	48	28	11	0	4	0	71	4	4	4
MH069731 A. cantonensis USA	16	16	16	16	16	16	12	12	11	15	143	15	20	4	12	12		4	4	61	31	15	61	52	12	12	4	4	15	31	15	15	15	15	15	15	15	35	8	61	40	15	12	15	12	84	15	15	15
MH069735 A. cantonensis USA	12	12	12	12	12	12	8	8	8	11	139	11	15	0	8	8	4		0	57	27	11	57	47	8	8	0	0	11	27	11	11	11	11	11	11	11	31	4	57	36	11	8	11	8	79	11	11	11
MH069733 A. cantonensis USA	12	12	12	12	12	12	8	8	8	11	139	11	15	0	8	8	4	0		57	27	11	57	47	8	8	0	0	11	27	11	11	11	11	11	11	11	31	4	57	36	11	8	11	8	79	11	11	11
MK516736 A. cantonensis Thailand	53	53	53	53	53	53	49	49	40	53	129	44	48	57	48	48	61	57	57		31	44	0	40	48	48	57	57	53	27	53	53	44	44	53	53	53	35	52	8	45	44	48	53	48	66	53	53	53
MK516735 A. cantonensis Thailand	23	23	23	23	23	23	19	19	23	23	119	27	23	27	19	19	31	27	27	31		27	31	23	19	19	27	27	23	4	23	23	27	27	23	23	23	15	27	31	19	27	19	23	19	53	23	23	23
AB684370 A. cantonensis Japan Okinawa	16	16	16	16	16	16	12	12	0	15	134	0	20	11	11	11	15	11	11	44	27		44	43	11	11	11	11	15	23	15	15	0	0	15	15	15	27	8	44	32	0	11	15	11	75	15	15	15
KY779737 A. cantonensis Laos	53	53	53	53	53	53	49	49	40	53	129	44	48	57	48	48	61	57	57	0	31	44		40	48	48	57	57	53	27	53	53	44	44	53	53	53	35	52	8	45	44	48	53	48	66	53	53	53
KY779738 A. cantonensis Vietnam	44	44	44	44	44	44	40	40	39	44	133	43	39	47	39	39	52	47	47	40	23	43	40		39	39	47	47	44	19	44	44	43	43	44	44	44	31	43	35	27	43	39	44	39	53	44	44	44
MK570631 A. cantonensis Australia Mosman	4	4	4	4	4	4	0	0	8	4	130	11	15	8	0	0	12	8	8	48	19	11	48	39		0	8	8	4	19	4	4	11	11	4	4	4	23	11	48	28	11	0	4	0	71	4	4	4
MK570629 A. cantonensis Spain Tenerife	4	4	4	4	4	4	0	0	8	4	130	11	15	8	0	0	12	8	8	48	19	11	48	39	0		8	8	4	19	4	4	11	11	4	4	4	23	11	48	28	11	0	4	0	71	4	4	4
MH069736 A. cantonensis USA	12	12	12	12	12	12	8	8	8	11	139	11	15	0	8	8	4	0	0	57	27	11	57	47	8	8		0	11	27	11	11	11	11	11	11	11	31	4	57	36	11	8	11	8	79	11	11	11
MH069732 A. cantonensis USA	12	12	12	12	12	12	8	8	8	11	139	11	15	0	8	8	4	0	0	57	27	11	57	47	8	8	0		11	27	11	11	11	11	11	11	11	31	4	57	36	11	8	11	8	79	11	11	11
GU138110 A. cantonensis Brazil	0	0	0	0	0	0	4	4	11	0	136	15	19	11	4	4	15	11	11	53	23	15	53	44	4	4	11	11		23	0	0	15	15	0	0	0	27	15	53	32	15	4	0	4	67	0	0	0
AB684368 A. cantonensis Thailand Bangkok	24	24	24	24	24	24	20	20	19	23	115	23	19	27	19	19	31	27	27	27	4	23	27	19	19	19	27	27	23		23	23	23	23	23	23	23	11	23	27	16	23	19	23	19	49	23	23	23
JX471057 A. cantonensis Brazil	0	0	0	0	0	0	4	4	11	0	136	15	19	11	4	4	15	11	11	53	23	15	53	44	4	4	11	11	0	23		0	15	15	0	0	0	27	15	53	32	15	4	0	4	67	0	0	0
JX471061 A. cantonensis Brazil	0	0	0	0	0	0	4	4	11	0	136	15	19	11	4	4	15	11	11	53	23	15	53	44	4	4	11	11	0	23	0		15	15	0	0	0	27	15	53	32	15	4	0	4	67	0	0	0
JX471060 A. cantonensis Brazil	16	16	16	16	16	16	12	12	0	15	134	0	20	11	11	11	15	11	11	44	27	0	44	43	11	11	11	11	15	23	15	15		0	15	15	15	27	8	44	32	0	11	15	11	75	15	15	15
JX471059 A. cantonensis Brazil	16	16	16	16	16	16	12	12	0	15	134	0	20	11	11	11	15	11	11	44	27	0	44	43	11	11	11	11	15	23	15	15	0		15	15	15	27	8	44	32	0	11	15	11	75	15	15	15
JX471058 A. cantonensis Brazil	0	0	0	0	0	0	4	4	11	0	136	15	19	11	4	4	15	11	11	53	23	15	53	44	4	4	11	11	0	23	0	0	15	15		0	0	27	15	53	32	15	4	0	4	67	0	0	0
JX471068 A. cantonensis Brazil	0	0	0	0	0	0	4	4	11	0	136	15	19	11	4	4	15	11	11	53	23	15	53	44	4	4	11	11	0	23	0	0	15	15	0		0	27	15	53	32	15	4	0	4	67	0	0	0
JX471056 A. cantonensis Brazil	0	0	0	0	0	0	4	4	11	0	136	15	19	11	4	4	15	11	11	53	23	15	53	44	4	4	11	11	0	23	0	0	15	15	0	0		27	15	53	32	15	4	0	4	67	0	0	0
KY703435 A. cantonensis Thailand	28	28	28	28	28	28	23	23	23	27	103	27	23	31	23	23	35	31	31	35	15	27	35	31	23	23	31	31	27	11	27	27	27	27	27	27	27		27	40	11	27	23	27	23	45	27	27	27
KY703433 A. cantonensis Thailand	15	15	15	15	15	15	12	12	4	15	133	8	12	4	11	11	8	4	4	52	27	8	52	43	11	11	4	4	15	23	15	15	8	8	15	15	15	27		52	31	8	11	15	11	75	15	15	15
KY703434 A. cantonensis Thailand	53	53	53	53	53	53	49	49	40	53	141	44	48	57	48	48	61	57	57	8	31	44	8	35	48	48	57	57	53	27	53	53	44	44	53	53	53	40	52		45	44	48	53	48	66	53	53	53
KY703436 A. cantonensis Thailand	32	32	32	32	32	32	28	28	27	32	104	32	27	36	28	28	40	36	36	45	19	32	45	27	28	28	36	36	32	16	32	32	32	32	32	32	32	11	31	45		32	28	32	28	49	32	32	32
JX471054 A. cantonensis Brazil	16	16	16	16	16	16	12	12	0	15	134	0	20	11	11	11	15	11	11	44	27	0	44	43	11	11	11	11	15	23	15	15	0	0	15	15	15	27	8	44	32		11	15	11	75	15	15	15
MN227185 A. cantonensis Spain Balearic Islands Majorca	4	4	4	4	4	4	0	0	8	4	130	11	15	8	0	0	12	8	8	48	19	11	48	39	0	0	8	8	4	19	4	4	11	11	4	4	4	23	11	48	28	11		4	0	71	4	4	4
JX471065 A. cantonensis Brazil	0	0	0	0	0	0	4	4	11	0	136	15	19	11	4	4	15	11	11	53	23	15	53	44	4	4	11	11	0	23	0	0	15	15	0	0	0	27	15	53	32	15	4		4	67	0	0	0
ON819883_Valencia female	4	4	4	4	4	4	0	0	8	4	130	11	15	8	0	0	12	8	8	48	19	11	48	39	0	0	8	8	4	19	4	4	11	11	4	4	4	23	11	48	28	11	0	4		71	4	4	4
JX471055 A. cantonensis Brazil	67	67	67	67	67	67	72	72	70	67	108	75	70	79	71	71	84	79	79	66	53	75	66	53	71	71	79	79	67	49	67	67	75	75	67	67	67	45	75	66	49	75	71	67	71		67	67	67
JX471067 A. cantonensis Brazil	0	0	0	0	0	0	4	4	11	0	136	15	19	11	4	4	15	11	11	53	23	15	53	44	4	4	11	11	0	23	0	0	15	15	0	0	0	27	15	53	32	15	4	0	4	67		0	0
JX471066 A. cantonensis Brazil	0	0	0	0	0	0	4	4	11	0	136	15	19	11	4	4	15	11	11	53	23	15	53	44	4	4	11	11	0	23	0	0	15	15	0	0	0	27	15	53	32	15	4	0	4	67	0		0
JX471064 A. cantonensis Brazil	0	0	0	0	0	0	4	4	11	0	136	15	19	11	4	4	15	11	11	53	23	15	53	44	4	4	11	11	0	23	0	0	15	15	0	0	0	27	15	53	32	15	4	0	4	67	0	0
JX471063 A. cantonensis Brazil	0	0	0	0	0	0	4	4	11	0	136	15	19	11	4	4	15	11	11	53	23	15	53	44	4	4	11	11	0	23	0	0	15	15	0	0	0	27	15	53	32	15	4	0	4	67	0	0	0
JX471062 A. cantonensis Brazil	0	0	0	0	0	0	4	4	11	0	136	15	19	11	4	4	15	11	11	53	23	15	53	44	4	4	11	11	0	23	0	0	15	15	0	0	0	27	15	53	32	15	4	0	4	67	0	0	0
GU138109 A. cantonensis Brazil	0	0	0	0	0	0	4	4	11	0	137	15	19	12	4	4	16	12	12	53	23	15	53	44	4	4	12	12	0	24	0	0	15	15	0	0	0	27	15	53	32	15	4	0	4	67	0	0	0
GU138106 A. cantonensis Japan	16	16	16	16	16	16	12	12	4	19	135	4	24	15	15	15	19	15	15	44	27	4	44	44	15	15	15	15	19	23	19	19	4	4	19	19	19	27	12	44	32	4	15	19	15	76	19	19	19
KU934246 A. cantonensis Thailand	144	144	144	144	144	144	138	138	129	144	4	129	131	146	137	137	150	146	146	124	126	129	124	140	137	137	146	146	144	121	144	144	129	129	144	144	144	109	140	136	110	129	137	144	137	114	144	144	144
KU934244 A. cantonensis Thailand	28	28	28	28	28	28	24	24	27	28	115	32	27	32	24	24	36	32	32	36	4	32	36	27	24	24	32	32	28	8	28	28	32	32	28	28	28	19	32	36	24	32	24	28	24	49	28	28	28
KU934247 A. cantonenis Thailand	138	138	138	138	138	138	132	132	130	137	0	135	125	140	131	131	144	140	140	130	120	135	130	134	131	131	140	140	137	116	137	137	135	135	137	137	137	103	134	142	104	135	131	137	131	109	137	137	137
KU934240 A.cantonensis Thailand	134	134	134	134	134	134	128	128	125	133	4	131	121	135	127	127	140	135	135	126	116	131	126	130	127	127	135	135	133	112	133	133	131	131	133	133	133	99	130	138	100	131	127	133	127	105	133	133	133
KU934238 A. cantonensis Thailand	134	134	134	134	134	134	128	128	125	133	8	131	121	135	127	127	140	135	135	126	116	131	126	130	127	127	135	135	133	112	133	133	131	131	133	133	133	99	130	138	100	131	127	133	127	99	133	133	133
KU934241 A. cantonensis Thailand	106	106	106	106	106	106	100	100	99	106	31	104	95	108	100	100	112	108	108	99	90	104	99	109	100	100	108	108	106	86	106	106	104	104	106	106	106	85	103	110	86	104	100	106	100	98	106	106	106
KU934243 A. cantonensis Thailand	24	24	24	24	24	24	19	19	23	23	120	27	23	27	19	19	31	27	27	31	0	27	31	23	19	19	27	27	23	4	23	23	27	27	23	23	23	15	27	31	20	27	19	23	19	53	23	23	23
KU934245 A. cantonensis Thailand	35	35	35	35	35	35	31	31	35	35	133	39	35	40	31	31	44	40	40	43	12	39	43	35	31	31	40	40	35	15	35	35	39	39	35	35	35	27	40	43	31	39	31	35	31	65	35	35	35
KU934242 A. cantonensis Thailand	119	119	119	119	119	119	113	113	111	118	15	117	107	121	113	113	125	121	121	111	102	117	111	121	113	113	121	121	118	97	118	118	117	117	118	118	118	86	115	123	87	117	113	118	113	99	118	118	118
KU934237 A. cantonensis Thailand	143	143	143	143	143	143	137	137	134	143	11	140	130	145	136	136	149	145	145	129	119	140	129	133	136	136	145	145	143	115	143	143	140	140	143	143	143	108	139	141	109	140	136	143	136	108	143	143	143
KU934239 A. cantonensis Thailand	24	24	24	24	24	24	20	20	19	24	116	23	19	27	20	20	32	27	27	28	4	23	28	19	20	20	27	27	24	0	24	24	23	23	24	24	24	12	23	28	16	23	20	24	20	49	24	24	24
Table B1. Pairwise p-distances between the COI sequences from Angiostrongylus cantonensis isolated individuals.
[truncated: 15 more columns]
